# Supplementary material for: Post-transplantation Burkitt lymphoma: a retrospective study of 55 patients
Source: PubMed Central journal article supplement — Haematologica. 2023 Mar 9;108(10):2814–9. doi: 10.3324/haematol.2022.282297 (PMC10543171; doi:10.3324/haematol.2022.282297), 2023-03-09
Supplement: 2022_282297_WALCZAK_SUPPL.pdf [file 2022_282297_WALCZAK_SUPPL.pdf]

# Post-transplantation Burkitt lymphoma: a retrospective study of 55 patients

Pierre Walczak,<sup>1</sup> Sylvain Choquet,<sup>1</sup> Jacques Dantal,<sup>2</sup> David Boutboul,<sup>3</sup> Felipe Suarez,<sup>4</sup> Marine Baron,<sup>1</sup> Véronique Morel,<sup>1</sup> Thomas Cluzeau,<sup>5</sup> Mohamed Touati,<sup>6</sup> Michelle Elias,<sup>7</sup> Emmanuel Bachy,<sup>8</sup> Emmanuelle Nicolas-Virelizier,<sup>9</sup> Roch Houot,<sup>10</sup> Geoffroy Venton,<sup>11</sup> Caroline Jacquet,<sup>12</sup> Marie-Pierre Moles-Moreau,<sup>13</sup> Fabrice Jardin,<sup>14</sup> Eric Durot,<sup>15</sup> Nouredine Balegrone,<sup>1</sup> Laure Ecotière,<sup>16</sup> Romain Guièze,<sup>17</sup> Nassim Kamar,<sup>18</sup> Loïc Ysebaert,<sup>19</sup> Lionel Couzi,<sup>20</sup> Hugo Gonzalez,<sup>21</sup> Louise Roulin,<sup>22</sup> Kevin Ou,<sup>23</sup> Sophie Caillard,<sup>24</sup> Heiner Zimmermann,<sup>25,26</sup> Ralf Ulrich Trappe,<sup>26,27</sup> and Damien Roos-Weil<sup>1</sup> for the K-VIROGREF study group

<sup>1</sup>Sorbonne Université, Service d'Hématologie Clinique, Hôpital Pitié-Salpêtrière, APHP, Paris, France; <sup>2</sup>Institut de Transplantation Urologie Néphrologie (ITUN), Service de Néphrologie et Immunologie clinique, CHU Nantes, Nantes, France; <sup>3</sup>Service d'Immunologie Clinique, Hôpital Saint-Louis, APHP, Paris, France; <sup>4</sup>Service d'Hématologie Clinique, Hôpital Necker, APHP, Paris, France; <sup>5</sup>Service d'Hématologie Clinique, CHU de Nice, Nice, France; <sup>6</sup>Service d'Hématologie Clinique, CHU Limoges, Limoges, France; <sup>7</sup>Service de Néphrologie, Hôpital Saint-Louis, APHP, Paris, France; <sup>8</sup>Service d'Hématologie Clinique, Hospices Civils de Lyon, Pierre-Bénite, France; <sup>9</sup>Service d'Hématologie, Centre Léon Bérard, Lyon, France; <sup>10</sup>Service d'Hématologie, CHU Rennes, Université de Rennes, INSERM U1236, Rennes, France; <sup>11</sup>Service d'Hématologie et Thérapie Cellulaire, Hôpital universitaire de la Conception, Marseille, France; <sup>12</sup>Service d'Hématologie, CHU de Nancy, Vandoeuvre les Nancy, France; <sup>13</sup>Service d'Hématologie, CHU d'Angers, Angers, France; <sup>14</sup>Service d'Hématologie, Centre Henri Becquerel, Rouen, France; <sup>15</sup>CHU Reims, Hématologie Clinique, Reims, France; <sup>16</sup>Service de Néphrologie, Hémodialyse et Transplantation Renale, Centre Hospitalier Universitaire de Poitiers, Poitiers, France; <sup>17</sup>Service d'Hématologie Clinique et Thérapie Cellulaire, CHU Clermont-Ferrand, Clermont-Ferrand, France; <sup>18</sup>Service de Néphrologie et Transplantation d'Organes, CHU Rangueil, Toulouse, France; <sup>19</sup>Service d'Hématologie, Institut Universitaire du Cancer Toulouse-Oncopole, Toulouse, France; <sup>20</sup>Service de Néphrologie, Transplantation, Dialyse et Aphérèses, CHU Bordeaux, France; <sup>21</sup>Service d'Hématologie, Centre Hospitalier René-Dubos, Pontoise, France; <sup>22</sup>Service Unité Hémopathies Lymphoïdes, Groupe Hospitalo-universitaire Chenevier Mondor, APHP Créteil, France; <sup>23</sup>Service de Néphrologie et Transplantation Rénale, Hôpital Foch, Suresnes, France; <sup>24</sup>Service de Néphrologie et Transplantation Rénale, CHU de Strasbourg, Strasbourg, France; <sup>25</sup>Department of Internal Medicine-Oncology, Carl v. Ossietzky University of Oldenburg, Pius-Hospital, Oldenburg, Germany; <sup>26</sup>Department of Hematology and Oncology, DIAKO Ev. Diakonie-Krankenhaus Bremen, Bremen, Germany and <sup>27</sup>Department of Internal Medicine II: Hematology and Oncology, University Medical Center Schleswig-Holstein, Campus Kiel, Kiel, Germany

Correspondence:

D. ROOS-WEIL - damien.roosweil@aphp.fr.

<https://doi.org/10.3324/haematol.2022.282297>

**Supplementary Figure S1. Flow-chart of different frontline therapies.**

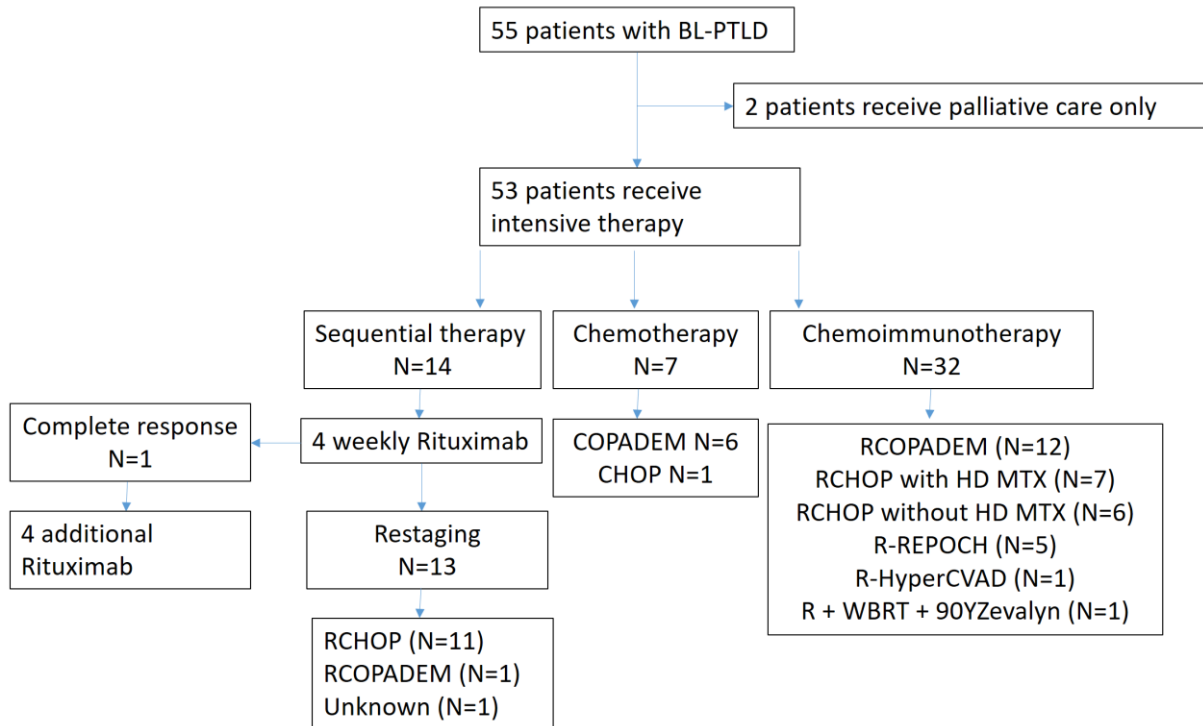

**Abbreviations:** BL-PTLD: Burkitt lymphoma post-transplant lymphoproliferative disorder; CHOP: Cyclophosphamide, Doxorubicin, Vincristine, Prednisone; COPADEM: Vincristine, Methotrexate, Cyclophosphamide, Doxorubicin, Prednisone; EPOCH: Etoposide, Doxorubicin, Vincristine, Cyclophosphamide, Prednisone; HD MTX: High Dose Methotrexate; HyperCVAD: Hyperfractionated Cyclophosphamide, Vincristine, Doxorubicin, Dexamethasone; R: Rituximab; WBRT: Whole Brain Radiation Therapy

**Supplementary Table S1. Patient characteristics according to first-line therapeutic strategy**

| <b>Patient characteristics</b>               | <b>Sequential treatment</b> | <b>Frontline CIT/CT</b> | <b>P value</b> |
|----------------------------------------------|-----------------------------|-------------------------|----------------|
| <b>Mean ECOG score (standard deviation)</b>  | 0.6 (0.91)                  | 1.61 (0.86)             | 0.01           |
| <b>Median age at time of diagnosis [IQR]</b> | 36.5 [30.4-49.2]            | 40.4 [29.4-54.1]        | 0.41           |
| <b>Extranodal disease</b>                    | 11 (78.6)                   | 36 (92.3)               | 0.18           |
| Bone                                         | 3 (21.4)                    | 9 (23.1)                | 1.00           |
| Digestive tract                              | 8 (57.1)                    | 19 (48.7)               | 0.77           |
| Liver                                        | 3 (21.4)                    | 11 (28.2)               | 1.00           |
| Lung                                         | 0 (0)                       | 3 (7.7)                 | 0.55           |
| Kidney                                       | 0 (0)                       | 2 (5.1)                 | 1.00           |
| CNS involvement                              | 0 (0)                       | 7 (18.0)                | 0.2            |
| Pleural/peritoneal                           | 0 (0)                       | 4 (10.3)                | 0.56           |
| Graft                                        | 0 (0)                       | 4 (10.3)                | 0.56           |
| Bone marrow                                  | 5 (31.3)                    | 18 (46.2)               | 0.55           |

**Abbreviations:** CIT, chemoimmunotherapy; CT, chemotherapy; CNS, central nervous system; IQR, interquartile.

**Supplementary Table S2. Causes of death**

| <b>Cause of death</b>                | <b>N (%)</b> |
|--------------------------------------|--------------|
| <b>Progressive disease</b>           | 11 (37.9)    |
| <b>Treatment toxicity*</b>           | 7 (24.1)     |
| During frontline R-EPOCH             | 1 (3.4)      |
| During frontline R-COPADEM           | 2 (6.9)      |
| During frontline R-CHOP              | 2 (6.9)      |
| During salvage R-Cytarabine          | 1 (3.4)      |
| During salvage R-Cytarabine-Thiotepa | 1 (3.4)      |
| <b>Unrelated cancer</b>              | 3 (10.3%)    |
| Bladder cancer                       | 1 (3.4)      |
| Myelodysplastic syndrome             | 1 (3.4)      |
| Different PTLD                       | 1 (3.4)      |
| <b>Cardiovascular disease</b>        | 4 (13.8)     |
| <b>Acute renal injury</b>            | 1 (3.4)      |
| <b>Pulmonary graft dysfunction**</b> | 1 (3.4)      |
| <b>Unknown</b>                       | 2 (6.9)      |

\*Due to sepsis, except for the death during R-EPOCH treatment (cerebral hemorrhage)

\*\*Due to reduction of immunosuppression in the BL-PTLD context
